# Supplementary material for: Rapid systemic spread and minimal immune responses following SIVsab intrarectal transmission in African green monkeys
Source: PubMed Central journal article supplement (PMC11623940; doi:10.1172/jci.insight.183751), 2024-12-06
Supplement: jciinsight-9-183751-s150.pdf [file jciinsight-9-183751-s150.pdf]

## **Rapid Systemic Spread and Minimal Immune Responses Following SIVsab Intrarectal Transmission in African Green Monkeys**

-----

Kevin D. Raehtz,<sup>1</sup> Cuiling Xu,<sup>1,2</sup> Claire Deleage,<sup>3</sup> Dongzhu Ma,<sup>2</sup> Benjamin B. Policicchio,<sup>4</sup> Egidio Brocca-Cofano,<sup>2#a</sup> Daniele Piccolo,<sup>5</sup> Kathryn Martin,<sup>1</sup> Brandon F. Keele,<sup>3</sup> Jacob D. Estes,<sup>3,#b</sup> Cristian Apetrei<sup>2,4¶\*</sup> and Ivona Pandrea,<sup>1,4¶\*</sup>

-----

### **SUPPLEMENTAL INFORMATION**

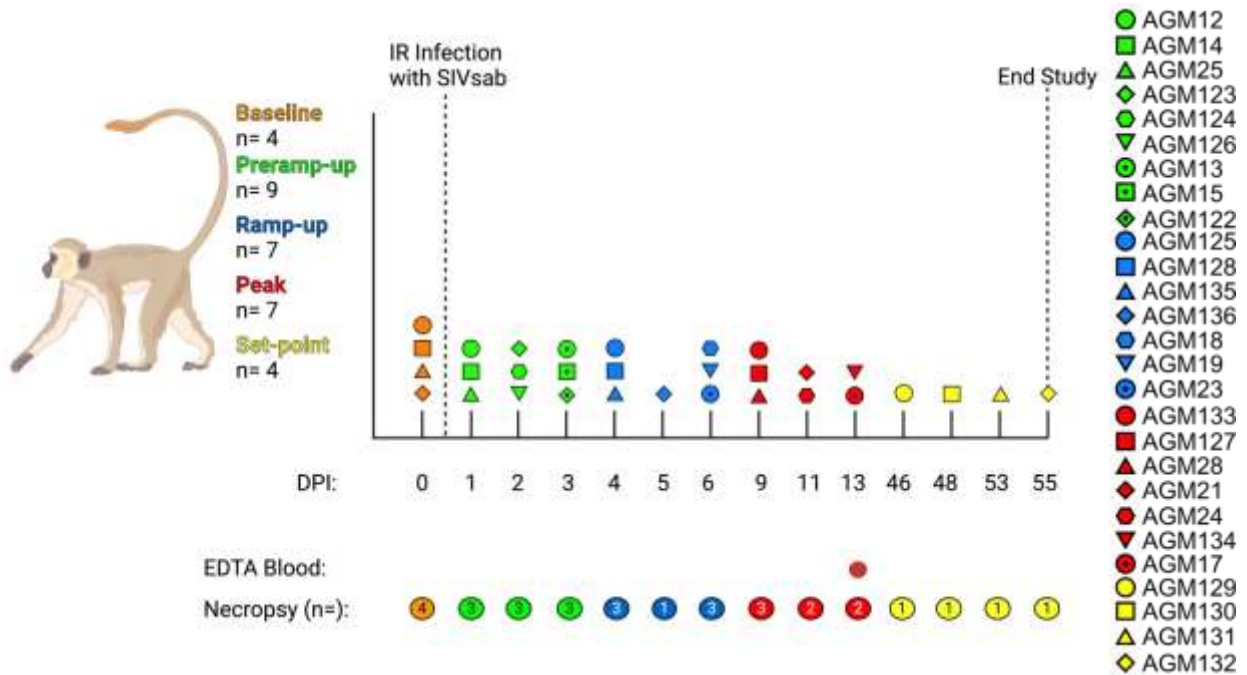

**Supplemental Figure S1: Animal groups for study of the early events of intrarectal (IR) SIVsab infection.** Thirty-one African green monkeys (AGMs) were included in this study (excluding the two AGMs which were inoculated, but uninfected). Twenty-seven AGMs were exposed IR to SIVsab92018 and became infected, while 4 AGMs were unchallenged as a control group. The AGMs were euthanized throughout the acute and early chronic SIV infection and were divided into the five groups based on their predicted viremic status at the day postinfection (DPI) that the necropsy was performed: (i) preinfection (orange, baseline); (ii) preramp-up (green, 1-3 DPI); (iii) ramp-up (blue, 4-6 DPI); (iv) peak (red, 9-13 DPI); (v) set-point (yellow, 46-55 DPI). Each AGM is assigned an individual symbol and color indicating at which stage of infection they were necropsied. The set-point animals also had EDTA blood drawn at the peak of infection, as well as at the time of their necropsies. Base Figure created with BioRender.com

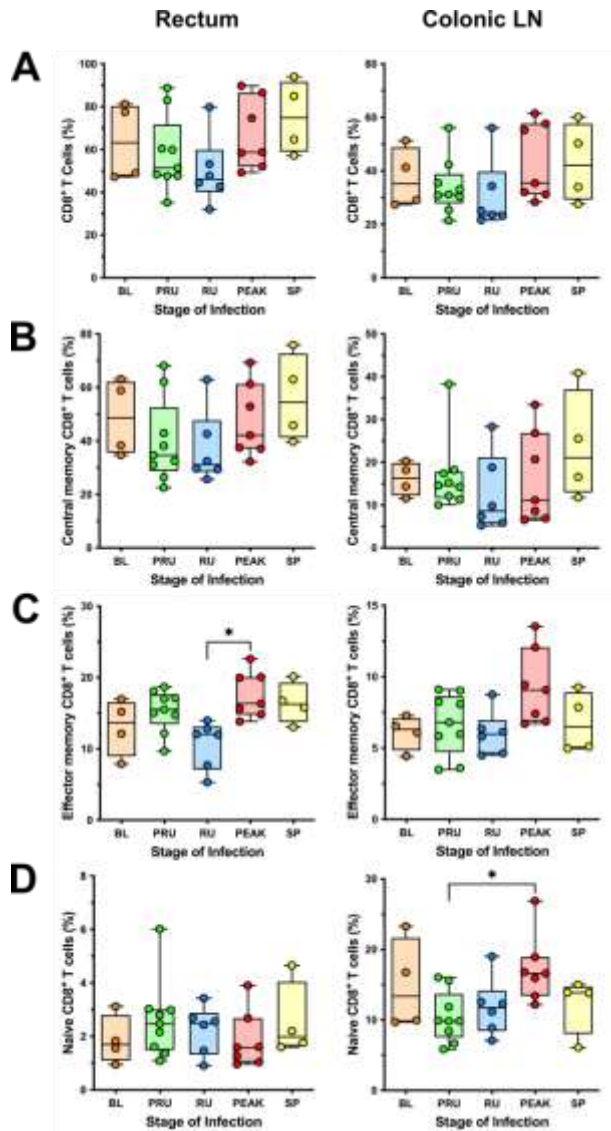

**Supplemental Figure S2: CD8<sup>+</sup> T-cell populations and subsets at the site of inoculation in SIVsab-infected African green monkeys (AGMs).** Percent populations of **(A)** the CD8<sup>+</sup> T cells, **(B)** CD8<sup>+</sup> central memory (CD28<sup>+</sup> CD95<sup>+</sup>), **(C)** CD8<sup>+</sup> effector memory (CD28<sup>neg</sup> CD95<sup>+</sup>), and **(D)** CD8<sup>+</sup> naïve cells (CD28<sup>+</sup> CD95<sup>neg</sup>) in the rectum and colonic LN. The data are shown as box-whisker plots displaying the median, 1<sup>st</sup> and 3<sup>rd</sup> quartiles and the min/max outliers, with individual points representing each AGM ( $n=31$ ). The five groups are based on DPI with the color codes: BL (baseline, preinfection, orange), PRU (preramp-up, 1-3 DPI, green), RU (ramp-up, 4-6 DPI, blue), PEAK (peak, 9-12 DPI, red) and SP (set-point, 46-55 DPI, yellow). An unpaired nonparametric Kruskal-Wallis test, followed by a Dunn's multiple means comparison was used, with asterisks indicating statistical significance when compared to baseline values, with  $*=p<0.05$ . Brackets are used to indicate between which time groups there is a significant difference.

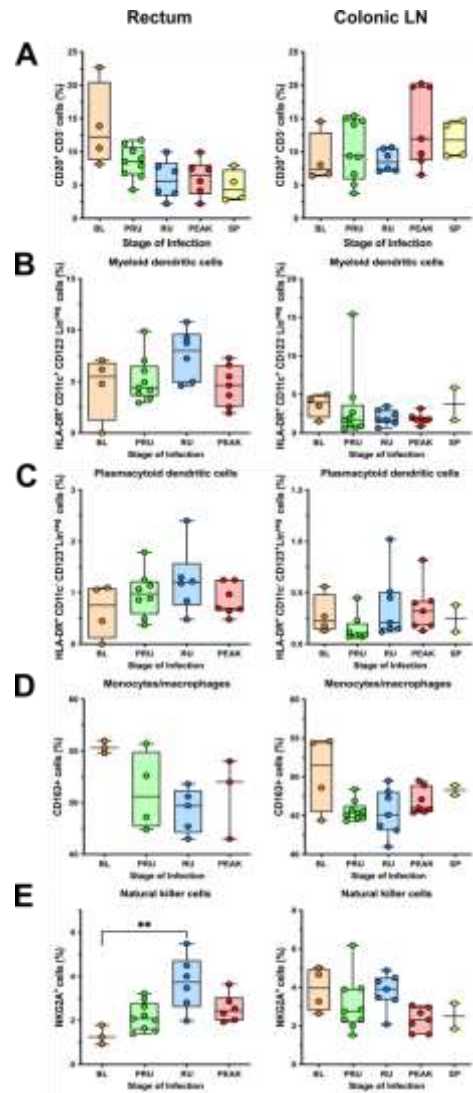

**Supplemental Figure S3: CD20<sup>+</sup> B cells and innate immune cell populations at the site of inoculation in SIVsab-infected African green monkeys (AGMs).** Percent populations of **(A)** the CD20<sup>+</sup> B cells, **(B)** myeloid dendritic cells (HLA-DR<sup>+</sup> CD11c<sup>+</sup> CD123<sup>neg</sup> Lineage<sup>neg</sup> [CD3<sup>neg</sup> CD20<sup>neg</sup> CD14<sup>neg</sup>]), **(C)** plasmacytoid dendritic cells (HLA-DR<sup>+</sup> CD11c<sup>neg</sup> CD123<sup>+</sup> Lineage<sup>neg</sup> [CD3<sup>neg</sup> CD20<sup>neg</sup> CD14<sup>neg</sup>]), **(D)** CD163<sup>+</sup> monocytes/macrophages and **(E)** NKG2A<sup>+</sup> natural killer cells in the rectum and colonic LN. The data are shown as box-whisker plots displaying the median, 1<sup>st</sup> and 3<sup>rd</sup> quartiles and the min/max outliers, with individual points representing each AGM ( $n=31$ ); some data points are not included due to lack of cells in the original assay. The five groups are based on DPI with the color codes: BL (baseline, preinfection, orange), PRU (preramp-up, 1-3 DPI, green), RU (ramp-up, 4-6 DPI, blue), PEAK (peak, 9-12 DPI, red) and SP (set-point, 46-55 DPI, yellow). An unpaired nonparametric Kruskal-Wallis test, followed by a Dunn's multiple means comparison was used, with asterisks indicating statistical significance when compared to baseline values, with  $*=p<0.05$ . Brackets are used to indicate between which time groups there is a significant difference.

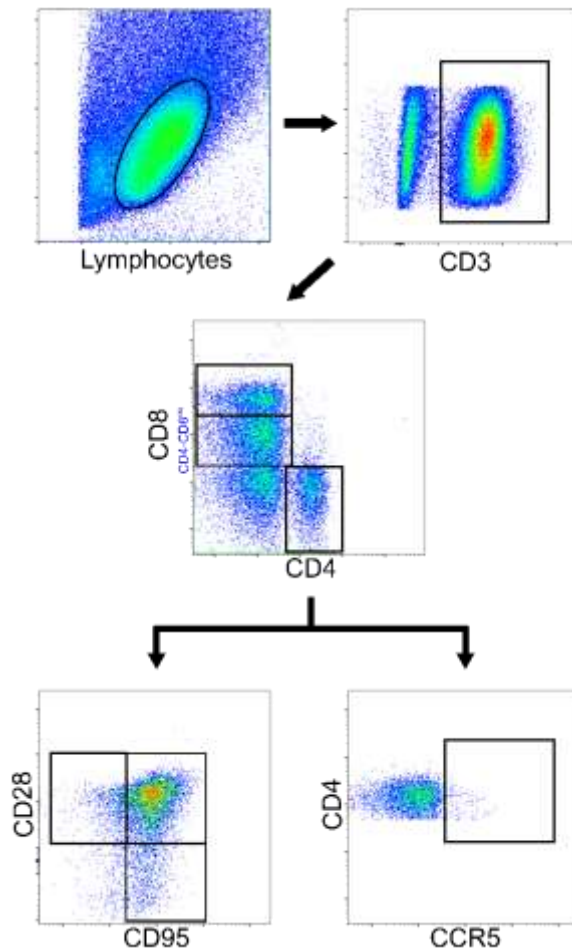

**Supplemental Figure S4: Flow cytometry gating strategy for CD4<sup>+</sup> and CD8<sup>+</sup> populations.** Gating strategy used to delineate primary T-cell populations (CD3<sup>+</sup>, CD4<sup>+</sup>, CD8<sup>+</sup>) and T-cell subsets (CCR5<sup>+</sup>, EM [CD95<sup>neg</sup> CD28<sup>+</sup>], CM [CD95<sup>+</sup> CD28<sup>+</sup>], and naïve [CD95<sup>neg</sup> CD28<sup>neg</sup>]). Also shown is the gating for the CD8 $\alpha$  subpopulation within the total CD8<sup>+</sup> population. The example data shown is from cells isolated from the rectum of one of the uninfected AGMs. All gates were generated using Flowjo software version 10.10.0 (Tree Star Inc, Ashland, OR).

## Rectum

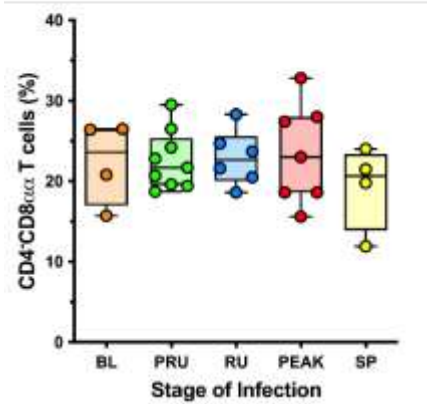

**Supplemental Figure S5: CD8αα<sup>+</sup> T-cell populations and subsets at the site of inoculation in SIVsab-infected African green monkeys (AGMs).** Percent populations of CD8αα T cells. The data are shown as box-whisker plots displaying the median, 1<sup>st</sup> and 3<sup>rd</sup> quartiles and the min/max outliers, with individual points representing each AGM ( $n=31$ ). The five groups are based on DPI with the color codes: BL (baseline, preinfection, orange), PRU (preramp-up, 1-3 DPI, green), RU (ramp-up, 4-6 DPI, blue), PEAK (peak, 9-12 DPI, red) and SP (set-point, 46-55 DPI, yellow). An unpaired nonparametric Kruskal-Wallis test, followed by a Dunn's multiple means comparison was used, with asterisks indicating statistical significance when compared to baseline values, with  $*=p<0.05$ . Brackets are used to indicate between which time groups there is a significant difference.

### Supplemental Table S1: RNAscope/IF Antibodies

| Target Marker | Antibody   | Clone   | Reference # | Manufacturer | Dilution |
|---------------|------------|---------|-------------|--------------|----------|
| CD68          | Mouse IgG  | KP1     | GA60961-2   | Agilent Dako | 1:500    |
| CD163         | Mouse IgG  | 10D6    | NCL-L-CD163 | Novocastra   | 1:500    |
| CD4           | Rabbit IgG | EPR6855 | ab133616    | Abcam Inc.   | 1:100    |
| HAM56         | Mouse      | HAM56   | NA          | Agilent Dako | 1:1000   |

**Table S2: Flow cytometry antibodies and fluorochromes**

| Antibody                         | Clone   | Reference # | Manufacturer       |
|----------------------------------|---------|-------------|--------------------|
| CD3e-FITC                        | SP34    | 556611      | BD Pharm           |
| CD95-FITC                        | DX2     | 555673      | BD Pharm           |
| CD14-PE                          | M5E2    | 555398      | BD Pharm           |
| CD163-PE                         | GHI/61  | 556018      | BD Pharm           |
| CD95-PE                          | DX2     | 555674      | BD Pharm           |
| CCR5-PE<br>(CD195-PE)            | 3A9     | 556042      | BD Pharm           |
| CD123-PE-<br>Cy7                 | 7G3     | 560826      | BD Pharm           |
| CD8 $\alpha$ /b -PE<br>Texas Red | 3B5     | MHCD0817    | Invitrogen         |
| CD28-PE-<br>Cy7                  | CD28.2  | 560684      | BD Pharm           |
| HLA-DR-<br>PE-Cy7                | L243    | 335813      | BD BioSci          |
| CD20-APC-<br>Cy7                 | L27     | 335794      | BD BioSci          |
| CD20-APC-<br>H7                  | 2H7     | 560853      | BD Pharm           |
| CD4-APC                          | L200    | 551980      | BD Pharm           |
| NKG2A-<br>APC                    | Z199.1  | A60797      | Beckman<br>Coulter |
| HLA-DR-<br>APC-Cy7               | L243    | 335796      | BD BioSci          |
| CD3-V450                         | SP34-2  | 560351      | BD Pharm           |
| CD11c-APC                        | S-HCL-3 | 340544      | BD BioSci          |
